# Supplementary material for: A solar-light driven h-WO 3 /2H-WS 2 -microalgae derived photocatalyst for rapid multi-dye degradation
Source: Royal Society of Chemistry journal article supplement (doi:10.1039/d5mh01195g), 2025-10-27
Supplement: d5mh01195g1.pdf [file d5mh01195g1.pdf]

## Solar-light driven h-WO<sub>3</sub>/2H-WS<sub>2</sub>-microalgae derived photocatalyst for rapid multi-dye degradation

Shrinath Bhat <sup>a, c</sup>, U. T. Uthappa <sup>b\*</sup>, Shervin Kabiri <sup>c</sup>, Heon-Ho Jeong <sup>d\*</sup> and Mahaveer D. Kurkuri <sup>a\*</sup>

<sup>a</sup> Centre for Research in Functional Materials (CRFM), JAIN (Deemed-to-be University), Jain Global Campus, Bengaluru-562112, Karnataka, India

<sup>b</sup> College of Chemistry and Environmental Engineering, Shenzhen University, Shenzhen 518055, China

<sup>c</sup> Adelaide University, School of Agriculture, Food and Wine, Waite Campus, Urrbrae, SA 5064, Australia

<sup>d</sup> Department of Chemical and Biomolecular Engineering, Chonnam National University, 50 Daehak-ro, Yeosu, Jeollanam-do 59626, Republic of Korea

\* Corresponding authors.

E-mail address: [sanjuuthappa@gmail.com](mailto:sanjuuthappa@gmail.com), [jeonghh29@jnu.ac.kr](mailto:jeonghh29@jnu.ac.kr) & [mahaveer.kurkuri@jainuniversity.ac.in](mailto:mahaveer.kurkuri@jainuniversity.ac.in).

### 1. Characterization:

The surface chemistry of DE, WS<sub>x</sub>O<sub>y</sub> and DE-WS<sub>x</sub>O<sub>y</sub> were analyzed via the PerkinElmer FTIR instrument by the KBr pellet method, and the analysis was done in the range of 4000-500 cm<sup>-1</sup>. Brunauer Emmett and Teller (BET) analysis was carried out to determine the multipoint surface area and Barrett-Joyner-Halenda (BJH) studies were done to calculate the total pore volume. Adsorption-desorption studies were carried out by using N<sub>2</sub> at liquid nitrogen temperature (-196 °C) on Belsorp-Max (M/s. Microtarc BEL, Japan). To explore the structural features of the catalysts, Powder X-ray diffraction (XRD) patterns for the samples were recorded on an Ultima-IV X-ray diffractometer (M/s. Rigaku Corporation, Japan) Ni filtered Cu Kα radiations (λ=1.5406 Å) with a 2θ scan speed of 2 degrees/min and a scan range of 5 to 80 degrees at 40 kV and 30 Ma. The surface morphological features of the prepared DE, WS<sub>x</sub>O<sub>y</sub> and DE-WS<sub>x</sub>O<sub>y</sub> were observed by Jeol JSM-7100F Field-Emission Scanning Electron Microscopy (FESEM). The surface charges of the DE, WS<sub>x</sub>O<sub>y</sub> and DE-WS<sub>x</sub>O<sub>y</sub> were measured by Litesizer 500 (Anton Paar) zeta potential instrument in an aqueous solution using Omega Cuvete Z. The state of elements and elemental composition in the samples (DE, WS<sub>x</sub>O<sub>y</sub> and

DE-WS<sub>x</sub>O<sub>y</sub>) were analysed by X-ray Photoelectron Spectroscopy (XPS; Thermo Scientific K-Alpha system and Al K-alpha X-ray source and an ion source energy range of 100 V to 3 KeV). Further, the thermal stability of the materials was evaluated from thermal gravimetric analysis (TGA) by PerkinElmer Diamond TG/DTA at a heating rate of 10 °C in an N<sub>2</sub> atmosphere. Photoluminescence (PL) Spectroscopy (Edinburgh instruments, FLS 1000; Detector R928P visible, Lamp-Xenon) was used to acquire PL spectra under identical settings and background-subtracted; inner-filter correction and integration window used for quantitative analysis. Metal ion analysis was carried out through Inductively Coupled Plasma - Optical Emission Spectroscopy (PerkinElmer Avio™ 200).

## 2. EDXS Elemental Mapping:

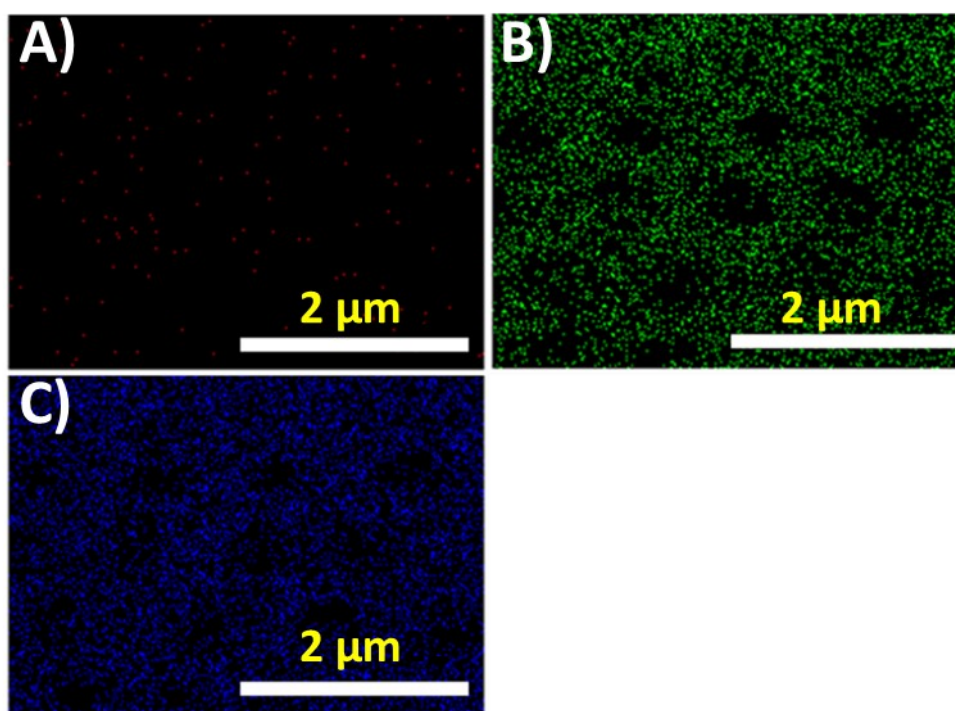

**Figure S1:** EDXS elemental mapping of A) C, B) O, C) Si elements for DE.

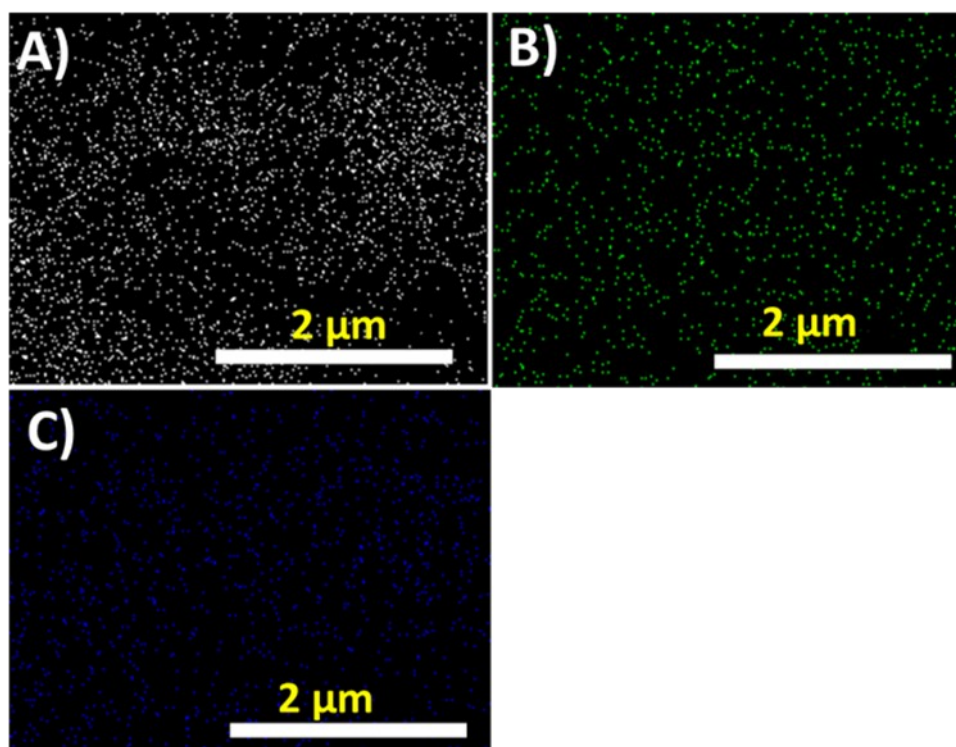

**Figure S2:** EDXS elemental mapping of A) O, B) W, C) S elements for  $\text{WS}_x\text{O}_y$ .

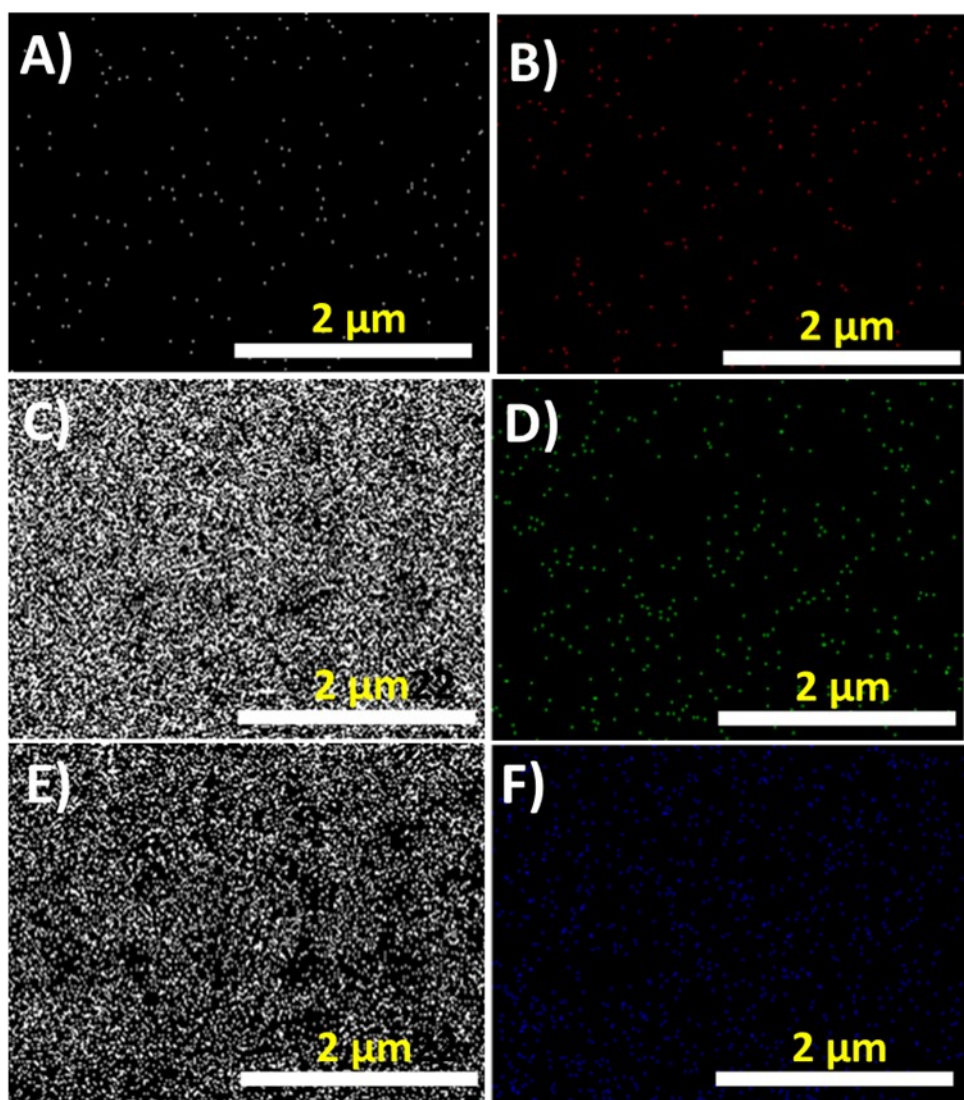

**Figure S3:** EDXS elemental mapping of A) C, B) N, C) Si, D) W, E) O, F) S elements for DE-WS<sub>x</sub>O<sub>y</sub>.

### 3. EDAX Spectra:

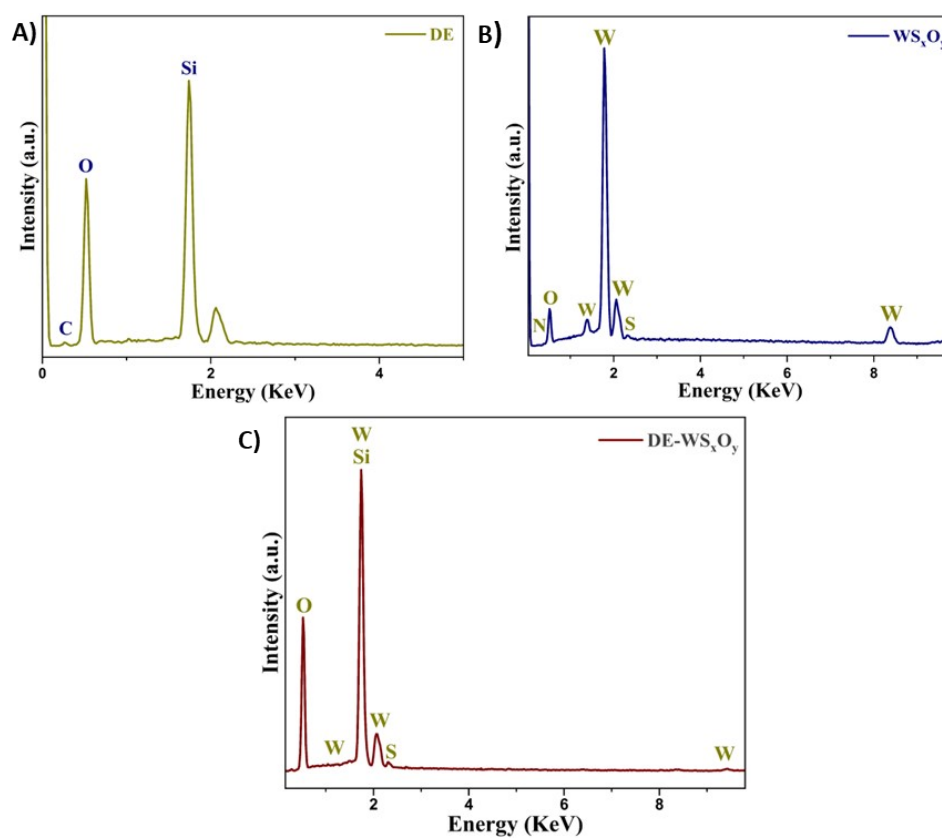

**Figure S4:** The energy dispersive X-ray analysis (EDAX) spectra of A) DE, B)  $WS_xO_y$  and C) DE- $WS_xO_y$ .



#### 4. EDS Elemental Mapping Images (TEM):

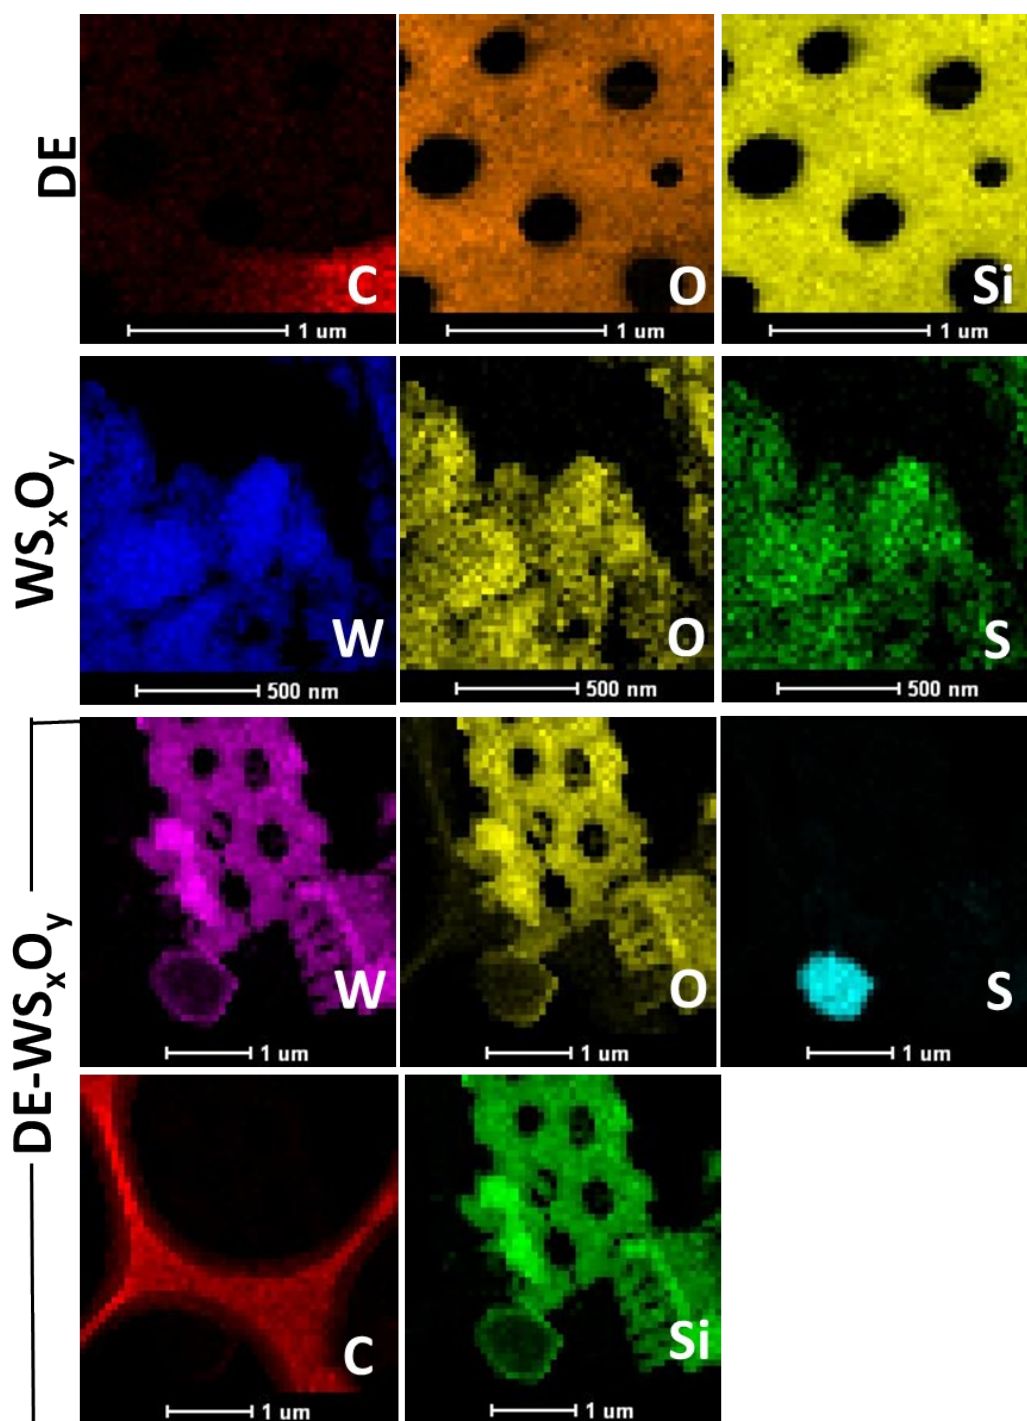

**Figure S5:** The energy dispersive X-ray spectroscopy (EDS) elemental mapping images.

## 5. FE-SEM Images:

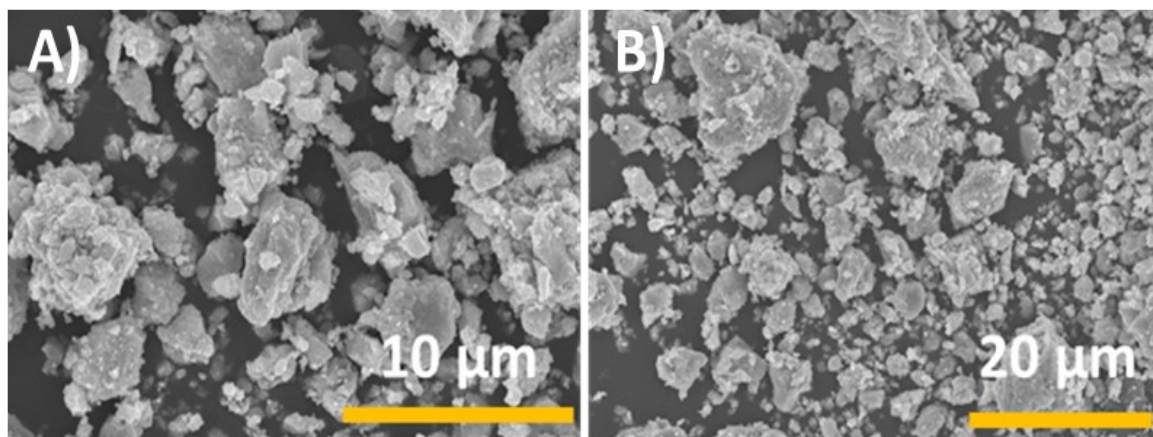

**Figure S6:** FE-SEM images for  $WS_xO_y$ .

## 6. TEM Images and Analysis:

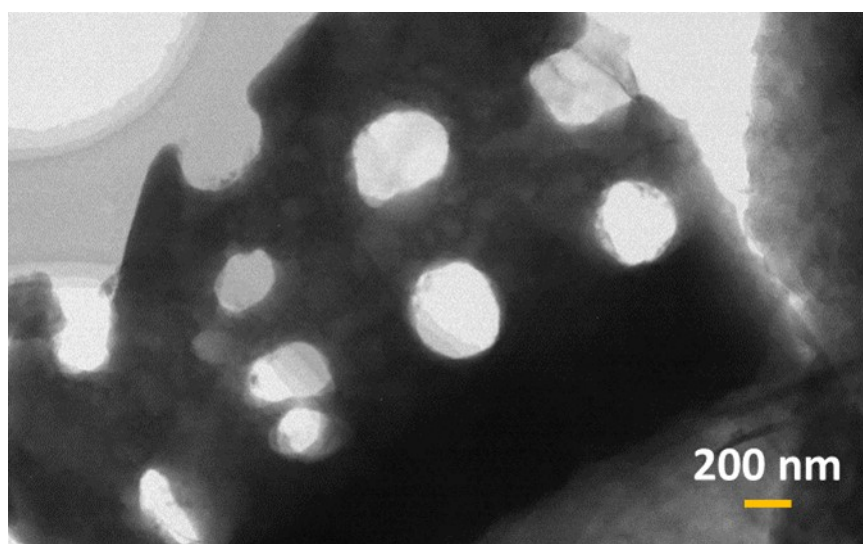

**Figure S7:** TEM images for DE frustule.

**Table S1:** Calculation of Miller indices for  $WS_xO_y$ .

| S.No. | $1/2r$ ( $\text{nm}^{-1}$ ) | $1/r$ ( $\text{nm}^{-1}$ ) | $r$ (nm) | d-spacing ( $\text{\AA}$ ) | (hkl)   |
|-------|-----------------------------|----------------------------|----------|----------------------------|---------|
| 1     | 5.574446                    | 2.787223                   | 0.35878  | 3.587801                   | (1 0 0) |
| 2     | 6.383706                    | 3.191853                   | 0.313298 | 3.132976                   | (2 0 0) |
| 3     | 8.272085                    | 4.136043                   | 0.241777 | 2.41777                    | (1 0 1) |
| 4     | 10.61623                    | 5.308117                   | 0.188391 | 1.883907                   | (1 0 6) |

|   |          |          |          |          |  |
|---|----------|----------|----------|----------|--|
| 5 | 12.27494 | 6.137468 | 0.162934 | 1.629336 |  |
| 6 | 14.9603  | 7.480151 | 0.133687 | 1.336871 |  |

**Table S2:** Calculation of Miller indices for DE-WS<sub>x</sub>O<sub>y</sub>.

| S.No. | 1/2r (nm <sup>-1</sup> ) | 1/r (nm <sup>-1</sup> ) | r (nm)     | d-spacing (Å°) | (hkl)   |
|-------|--------------------------|-------------------------|------------|----------------|---------|
| 1     | 4.569131                 | 2.284565256             | 0.43772004 | 4.377200421    | (1 0 0) |
| 2     | 6.432651                 | 3.21632529              | 0.31091383 | 3.109138256    | (2 0 0) |
| 3     | 7.903356                 | 3.951678075             | 0.25305705 | 2.53057051     | (1 0 1) |

## 7. BET Surface Area Analysis:

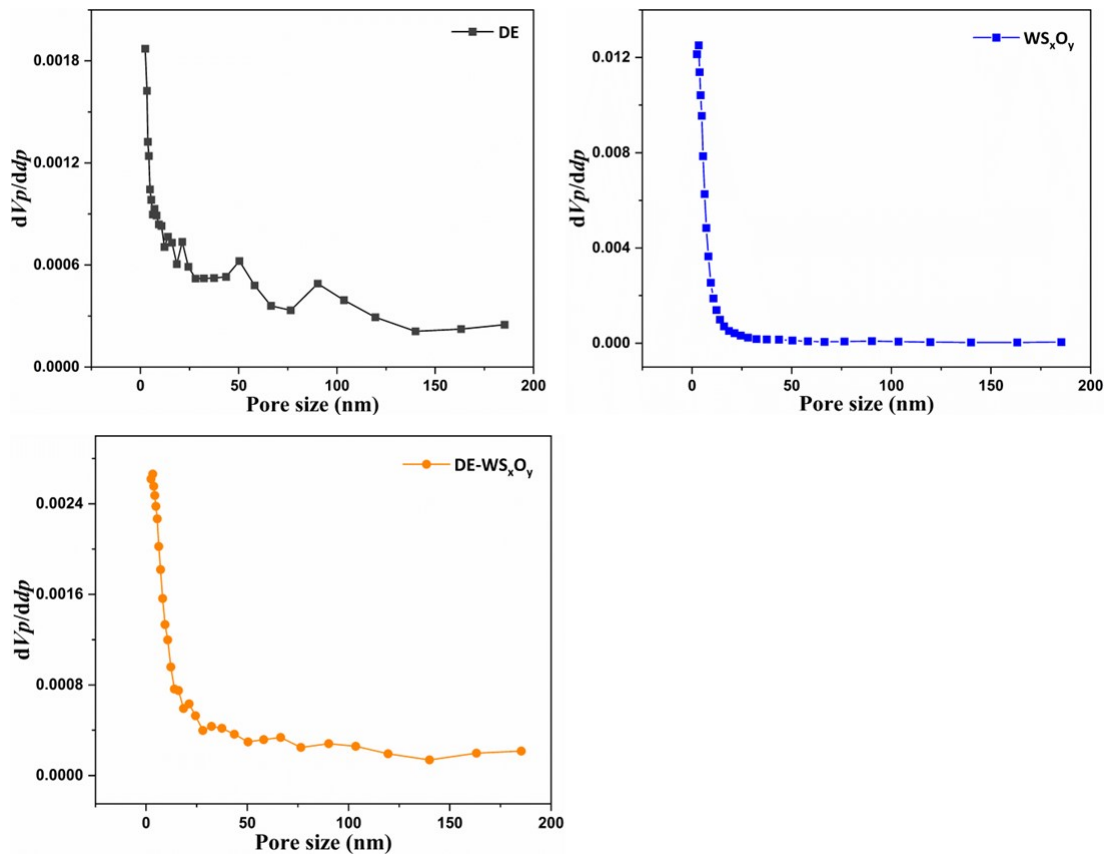

**Figure S8:** The pore size distribution plots for DE, WS<sub>x</sub>O<sub>y</sub> and DE-WS<sub>x</sub>O<sub>y</sub>.

**Table S3:** Outline of the BET surface area parameters.

| Material | Surface area (m <sup>2</sup> /g) | Pore diameter (nm) | Pore volume (cm <sup>3</sup> /g) |
|----------|----------------------------------|--------------------|----------------------------------|
|----------|----------------------------------|--------------------|----------------------------------|



|                                   |        |        |          |
|-----------------------------------|--------|--------|----------|
| DE                                | 26.169 | 12.983 | 0.084936 |
| WS <sub>x</sub> O <sub>y</sub>    | 100.15 | 4.1696 | 0.1044   |
| DE-WS <sub>x</sub> O <sub>y</sub> | 24.383 | 11.952 | 0.072856 |

## 8. XPS Analysis:

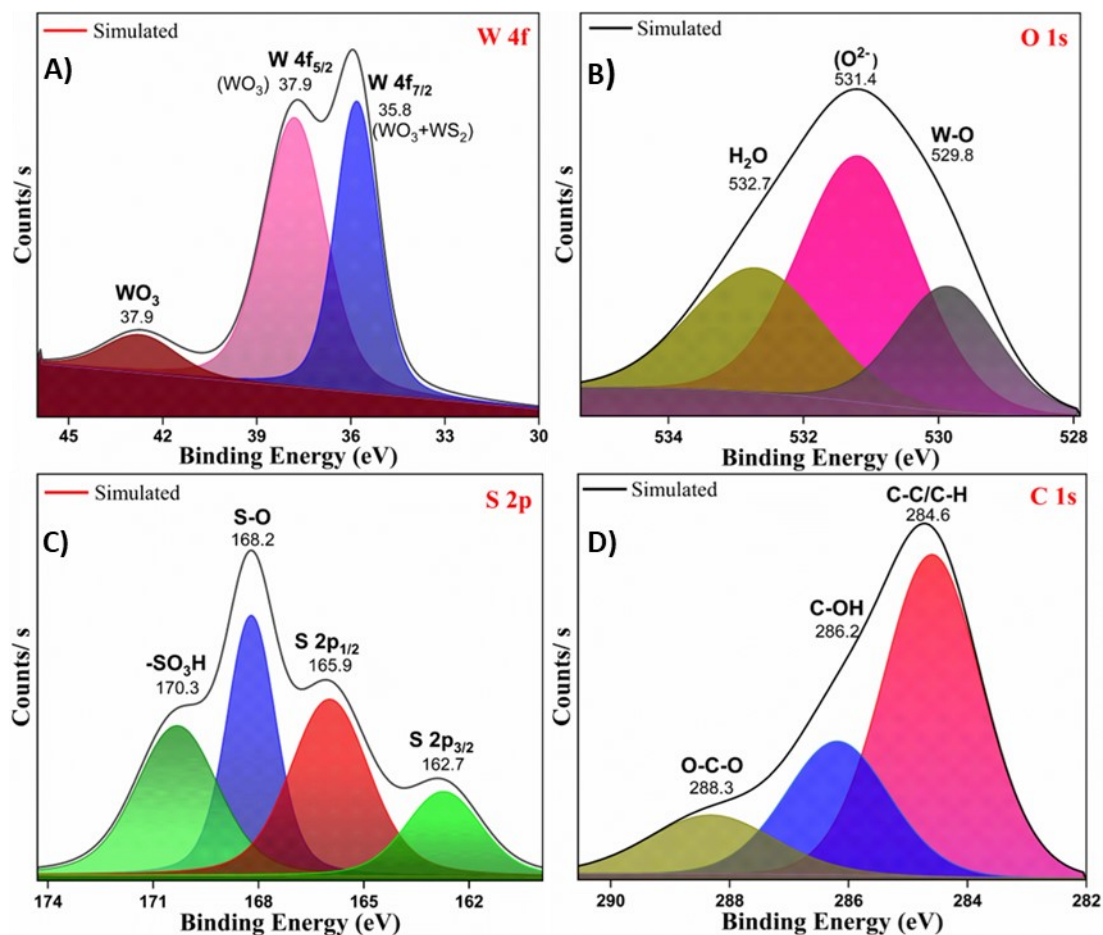

**Figure S9:** High-resolution spectra for W 4f, S 2p, O 1s and C 1s electrons of WS<sub>x</sub>O<sub>y</sub>.

**Table S4:** Elemental percentage of different atoms by XPS analysis.

| Material                          | Atomic Composition (%) |      |       |      |      |
|-----------------------------------|------------------------|------|-------|------|------|
|                                   | C                      | Si   | O     | W    | S    |
| DE                                | 59.48                  | 7.31 | 33.21 | -    | -    |
| WS <sub>x</sub> O <sub>y</sub>    | 50.77                  | -    | 44.37 | 0.13 | 1.5  |
| DE-WS <sub>x</sub> O <sub>y</sub> | 45.6                   | 6.87 | 46.69 | 0.12 | 0.42 |

## 9. Zeta potential Analysis:

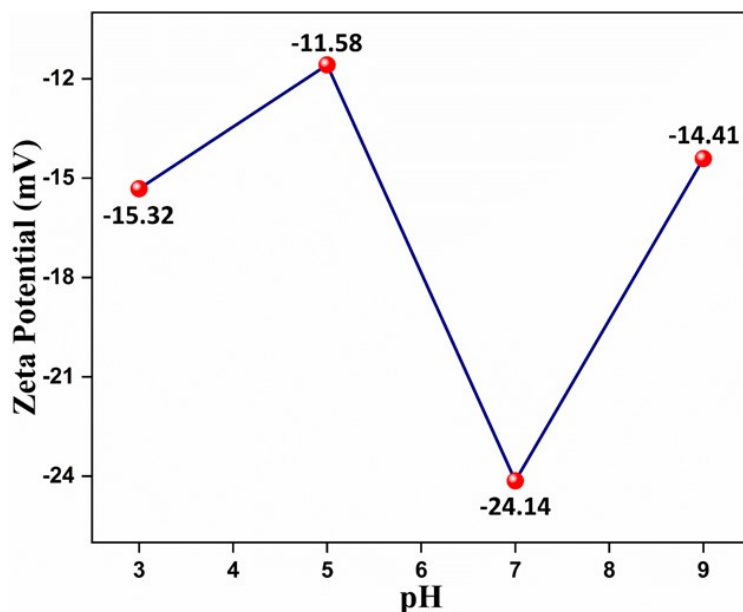

**Figure S10:** Zeta potential measurement of the DE-WS<sub>x</sub>O<sub>y</sub> at different pH.

## 10. UV-Visible-DRS Analysis:

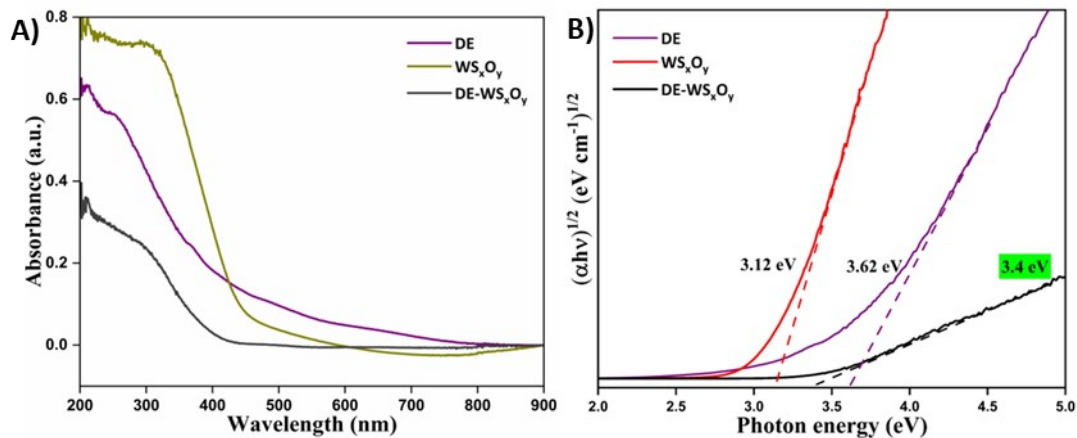

**Figure S11:** Energy band structure of DE, WS<sub>x</sub>O<sub>y</sub> and DE-WS<sub>x</sub>O<sub>y</sub>. A) UV-Visible diffuse reflectance spectra, B) the corresponding tauc plot.

The band gap energies were calculated using the Tauc-equation:

$$(\alpha h\nu)^{1/m} = k (h\nu - E_g) \quad \dots\dots\dots (1)$$

Where,  $E_g$  - The energy of optical band gap,  $k$  (constant) and  $m=1/2$  in case of direct energy gap,  $m=2$  in case of indirect energy gap.

$(\alpha h\nu)^{1/2}$  was plotted versus  $h\nu$  and the linear portion of the plot was extrapolated to the ordinate as shown in Figure S11B.

## 11. Results and Discussions:

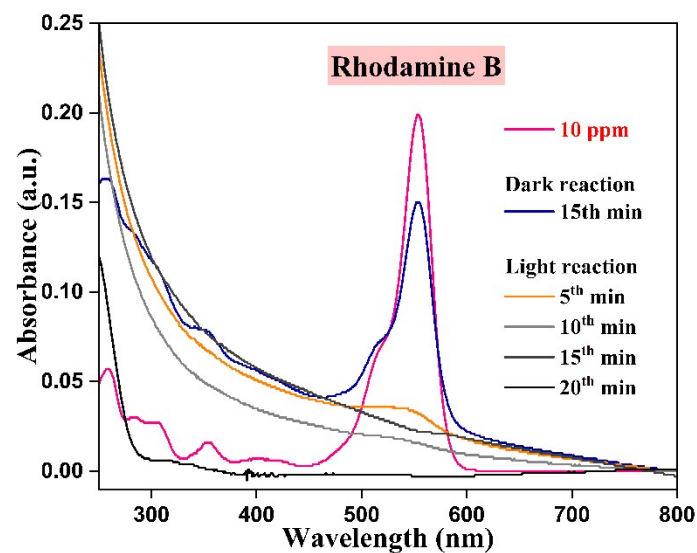

**Figure S12:** UV-Visible plot for the Decoloration of Rh B with DE-  $WS_xO_y$  as catalyst.

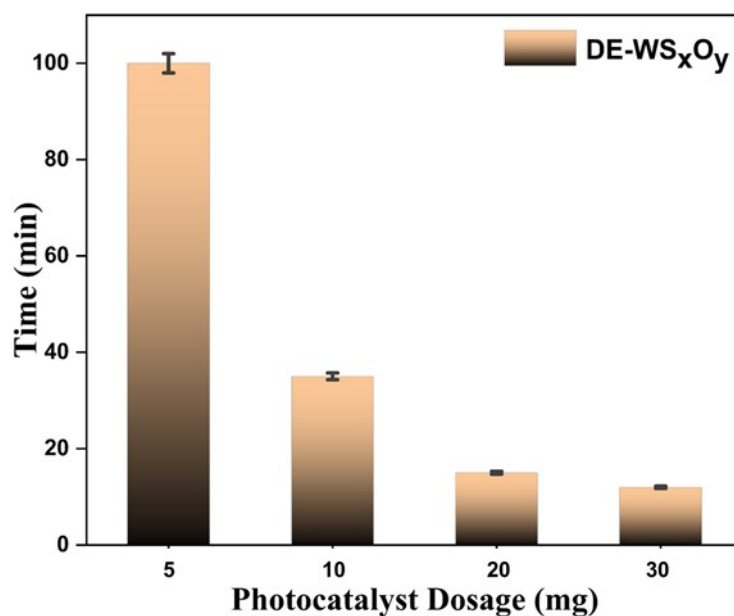

**Figure S13:** Effect of DE- $WS_xO_y$  photocatalyst dosage on photodegradation time.

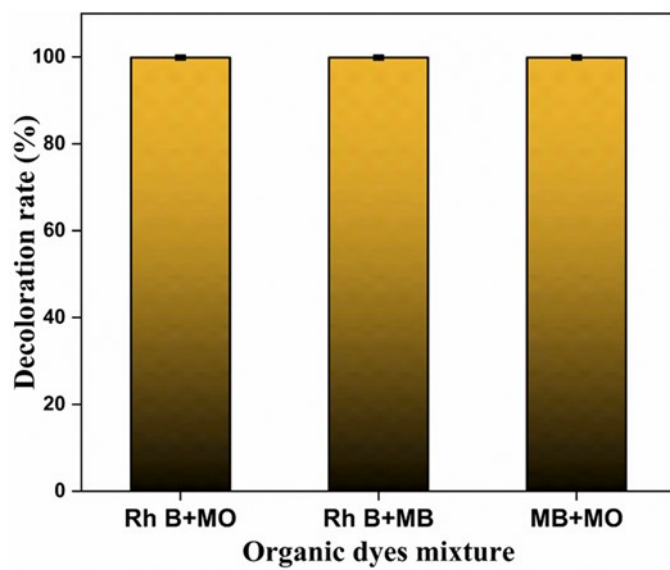

**Figure S14:** Photocatalytic activity for mixed dyes by DE-WS<sub>x</sub>O<sub>y</sub>.

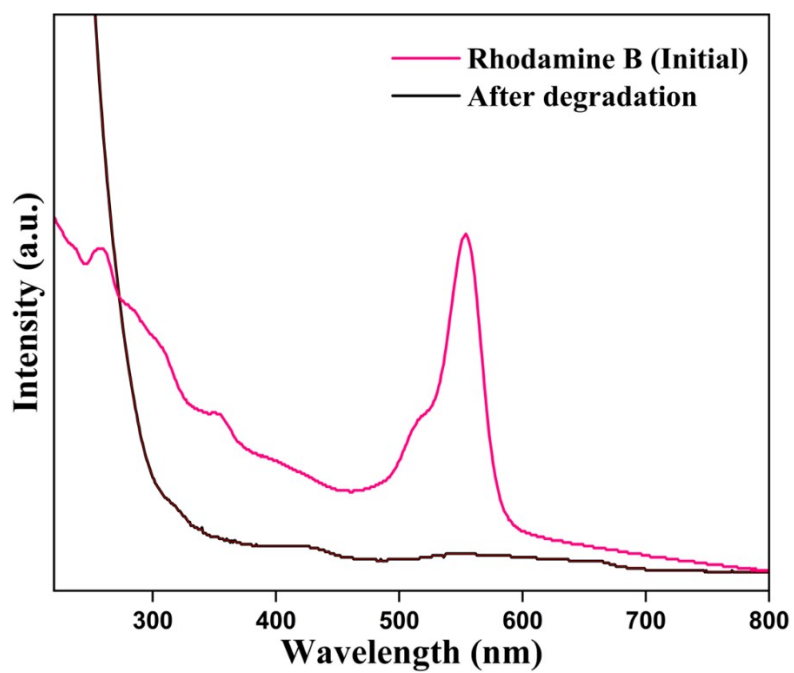

**Figure S15:** UV-Visible plot showing Photocatalytic activity for Rh B dye by DE-WS<sub>x</sub>O<sub>y</sub> /PDMS cylindrical discs.

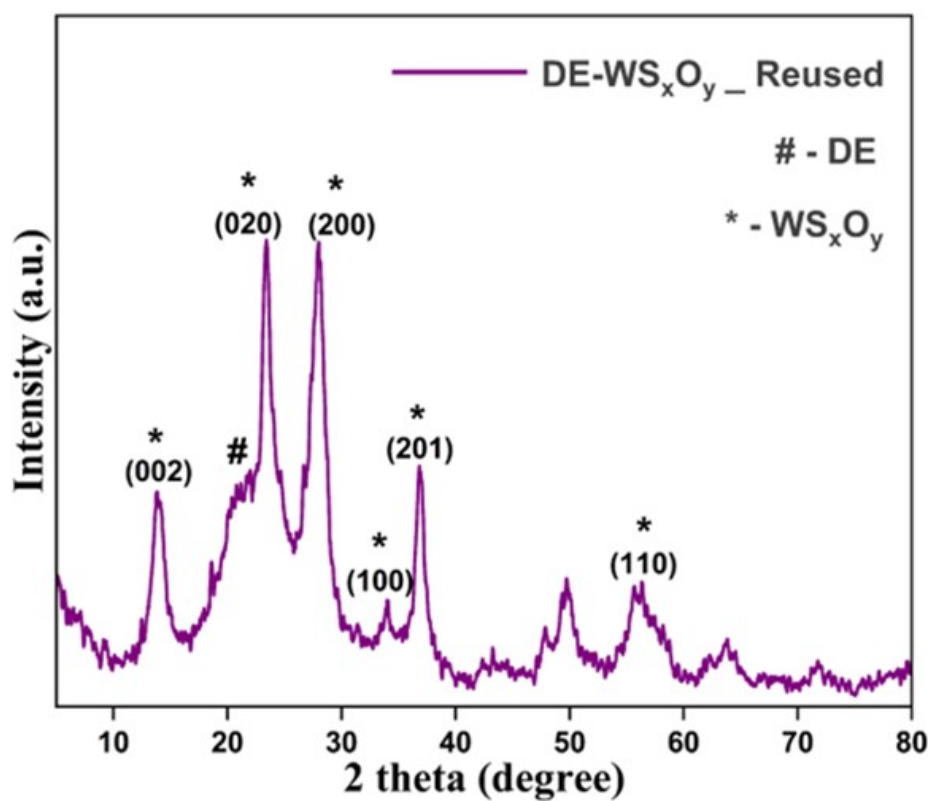

**Figure S16:** P-XRD analysis for phase structure analysis for reused DE-WS<sub>x</sub>O<sub>y</sub> photocatalyst.

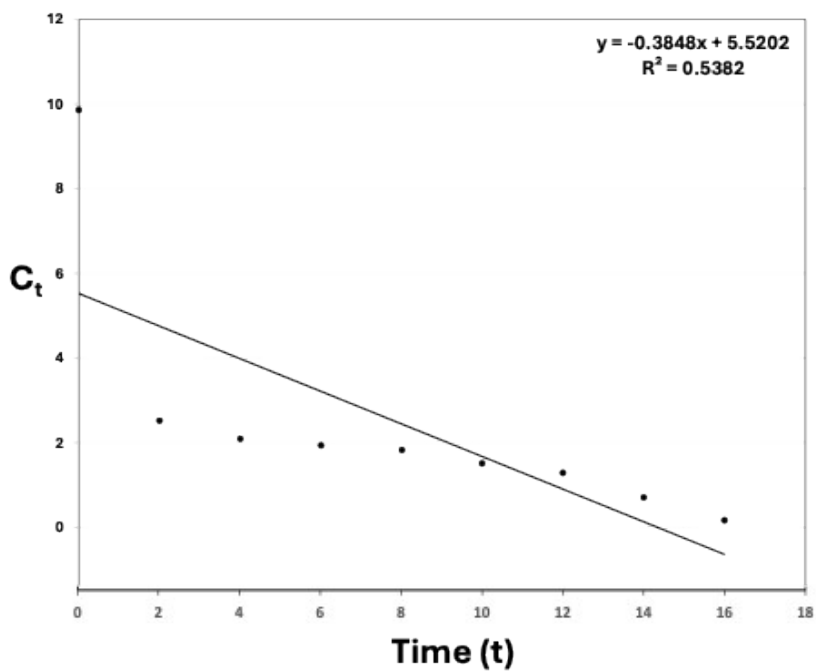

**Figure S17:** Zero-order kinetic model study for the photodegradation of rhodamine B by DE-WS<sub>x</sub>O<sub>y</sub> catalyst.



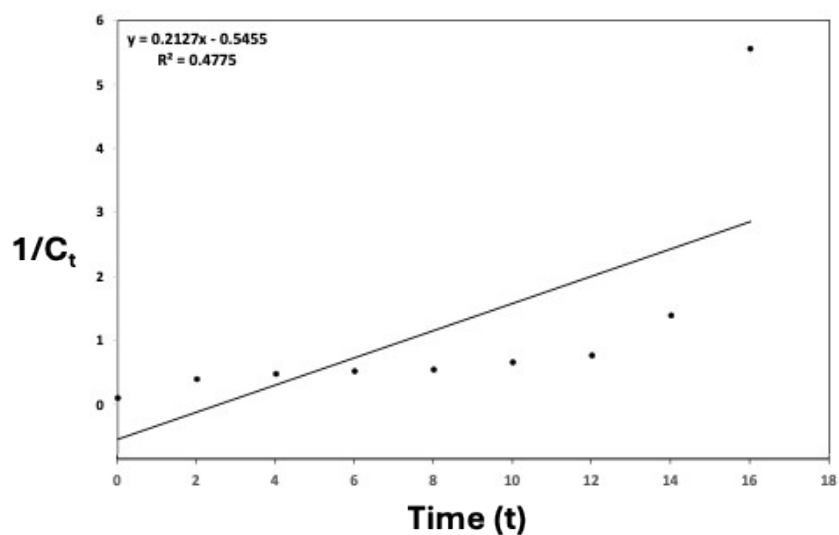

**Figure S18:** Second-order kinetic model study for the photodegradation of Rh B by DE-WS<sub>x</sub>O<sub>y</sub> catalyst.

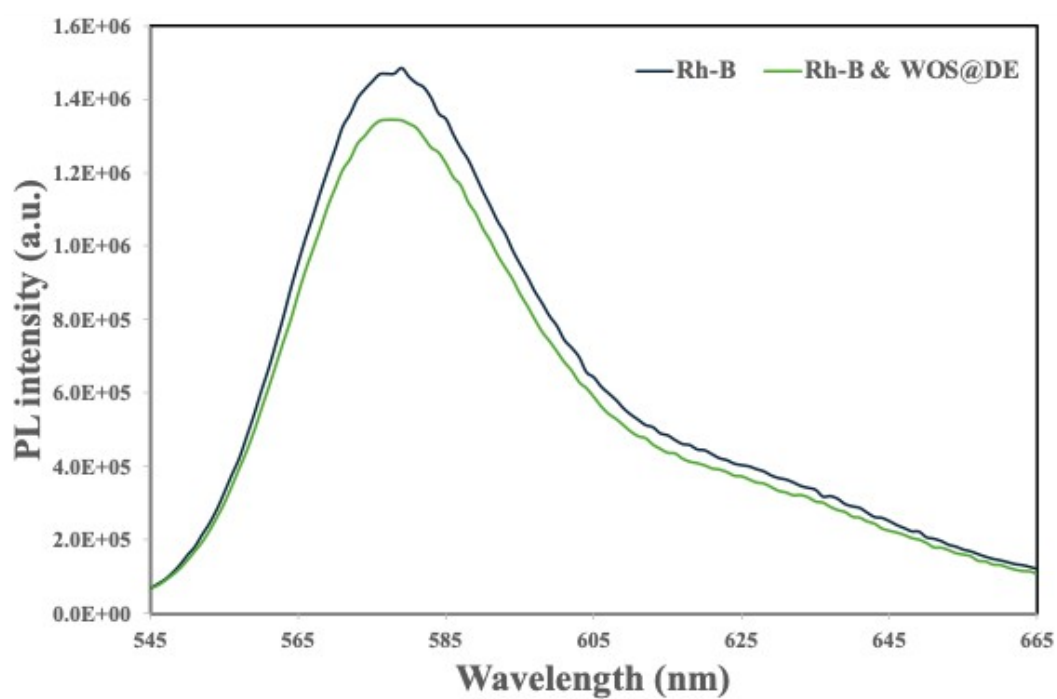

**Figure S19.** PL emission of Rhodamine B (1 mg L<sup>-1</sup>) with and without DE-WS<sub>x</sub>O<sub>y</sub> (2 mg) catalyst.

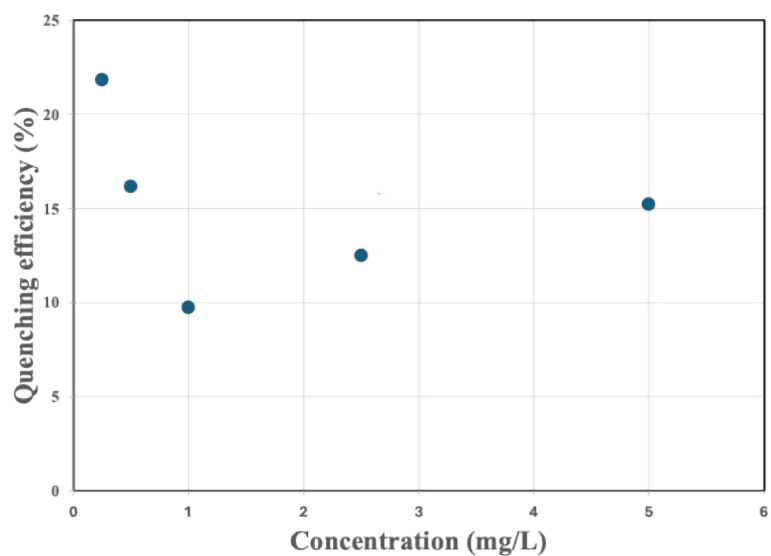

**Figure S20:** Quenching of Rhodamine B fluorescence by DE-WS<sub>x</sub>O<sub>y</sub> catalyst as a function of dye concentration.

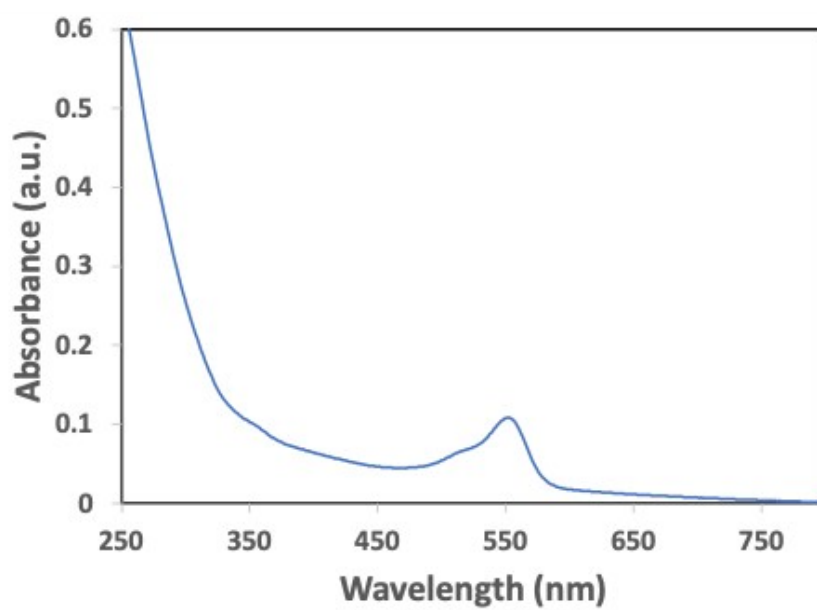

**Figure S21:** UV-visible plot showing sorption of Rh B on uncoated PDMS.
